# Supplementary material for: Phosphorylation of INF2 by AMPK promotes mitochondrial fission and oncogenic function in endometrial cancer
Source: PubMed Central journal article supplement (PMC10794193; doi:10.1038/s41419-024-06431-0), 2024-01-17

Figure 2A

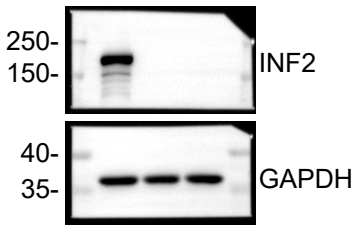

Figure 3A

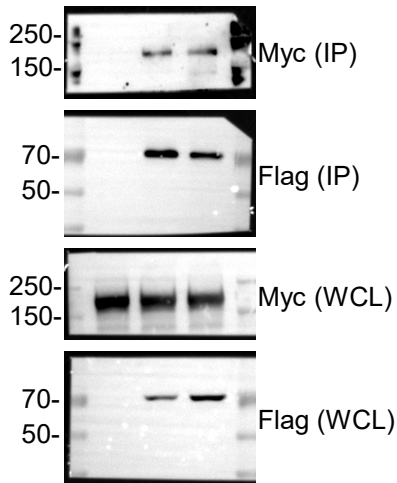

Figure 3B

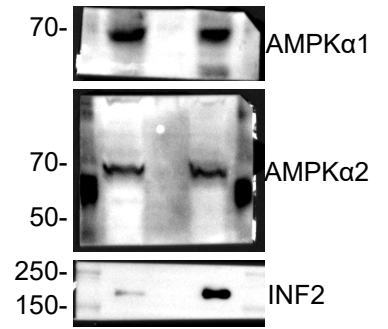

Figure 3C

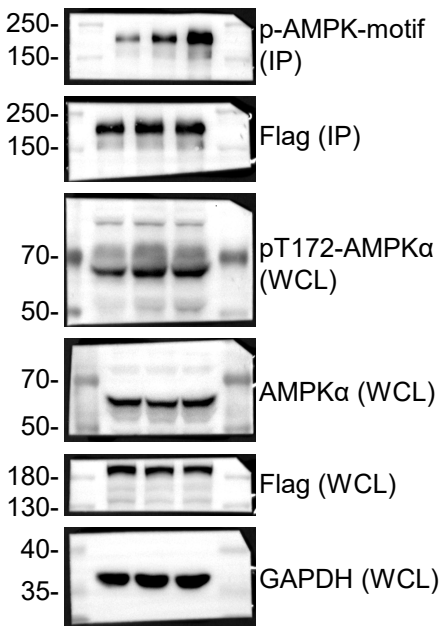

Figure 3E

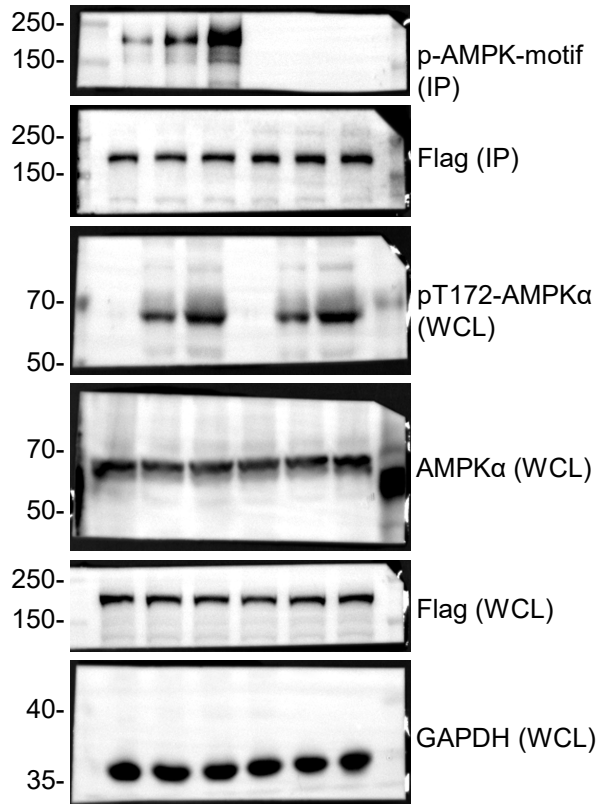

Figure 3F

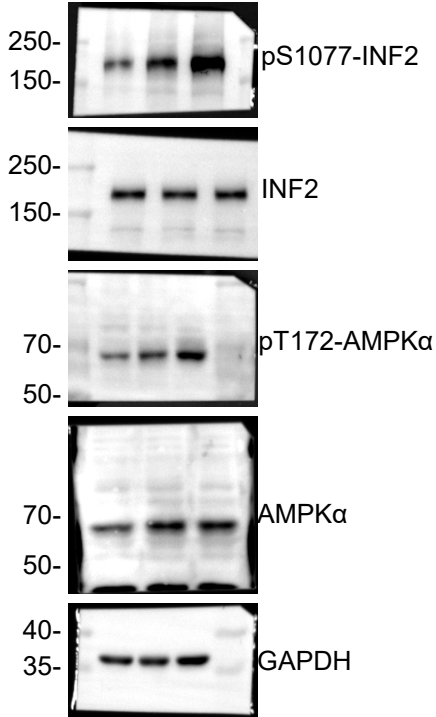

Figure 3G

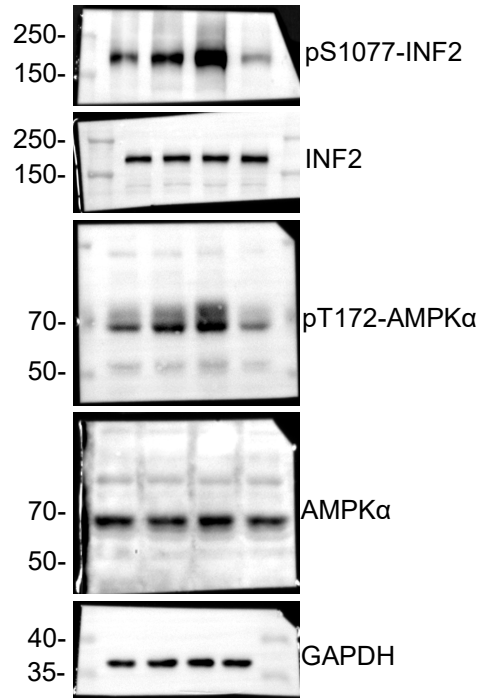

Figure 3H

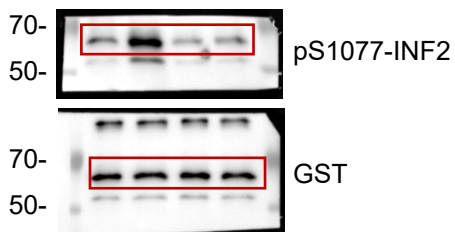

Figure 4E

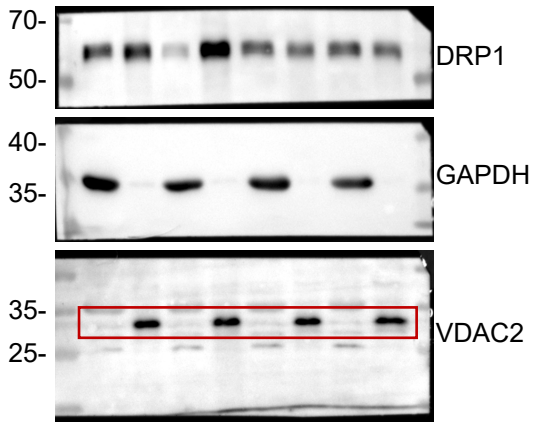

Figure 4F

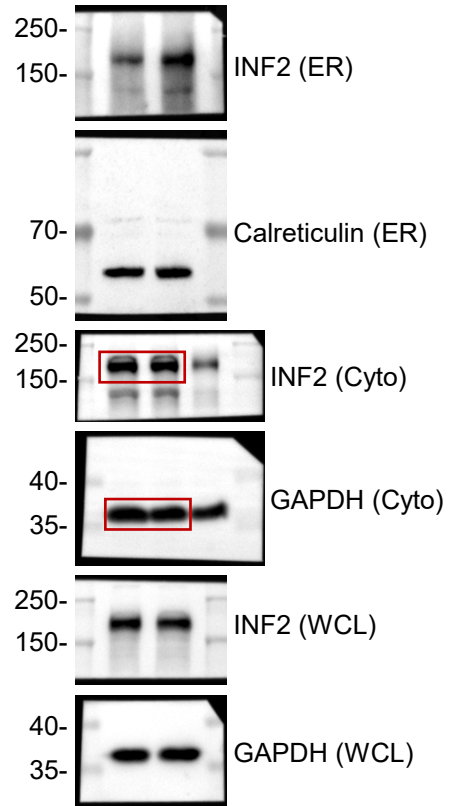

Figure 5A

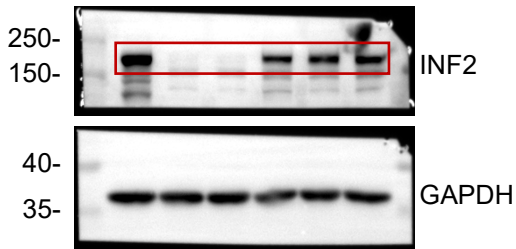

Figure 5F

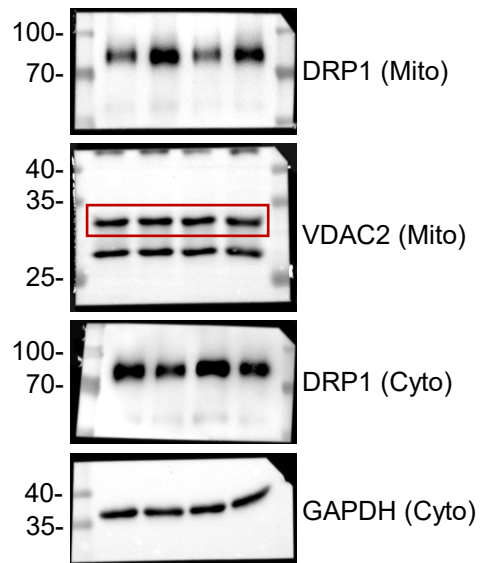

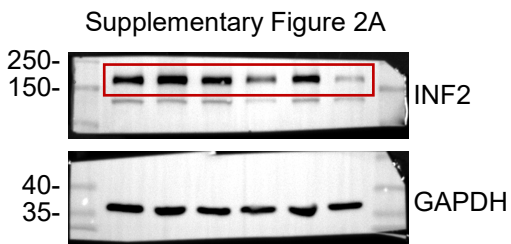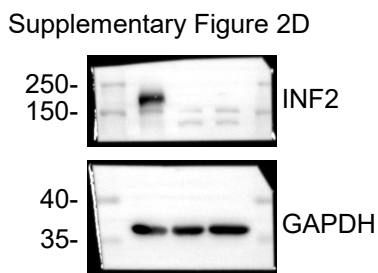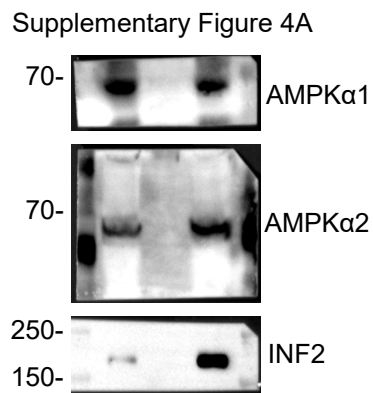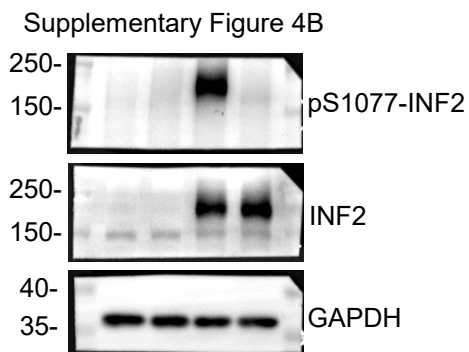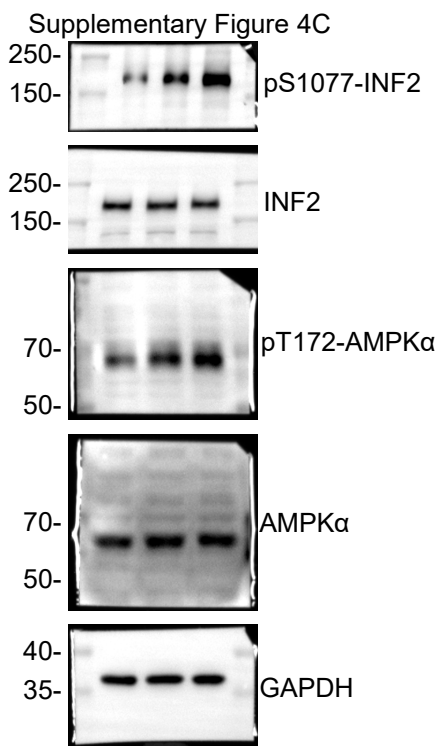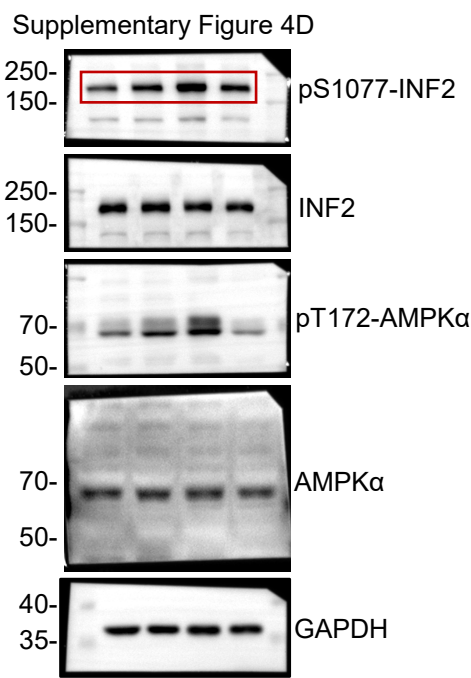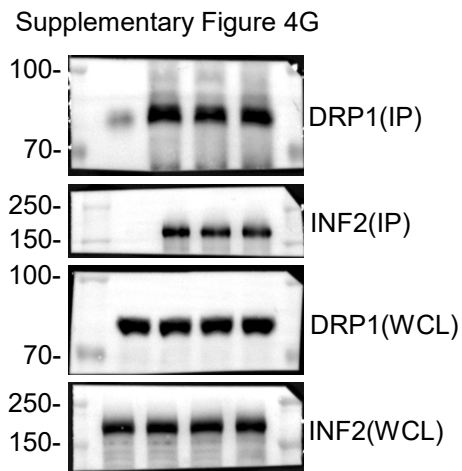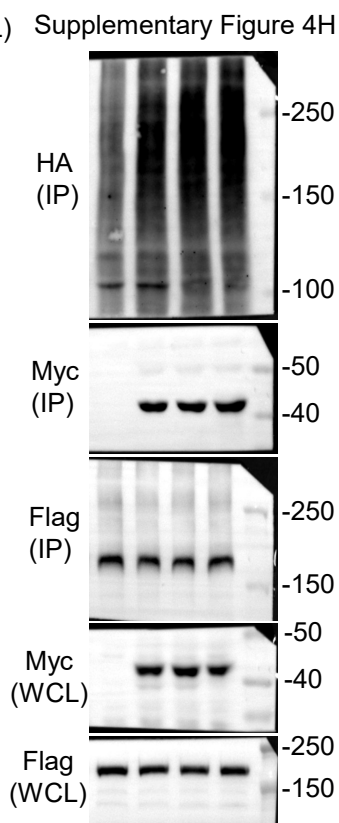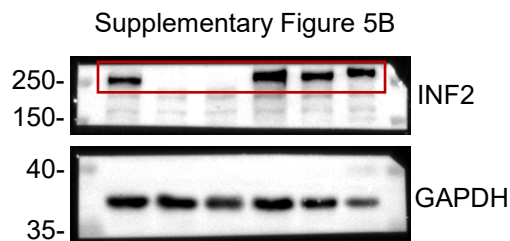

Supplement: 41419_2024_6431_MOESM2_ESM.pdf [file 41419_2024_6431_MOESM2_ESM.pdf]
